# Supplementary material
Source: bioRxiv or medRxiv preprint supplement (https://medrxiv.org/highwire/filestream/83510/field_highwire_adjunct_files/0/2020.05.29.20117069-1.pdf)

## **Electronic Supplementary Information**

# **Regression Analysis of COVID-19 Spread in India and its Different States**

Poonam Chauhan<sup>1</sup>, Ashok Kumar<sup>1</sup> and Pooja Jamdagni<sup>2\*</sup>

*<sup>1</sup>Department of Physics, School of Basic and Applied Sciences, Central University of Punjab,  
Bathinda, India 151001*

*<sup>2</sup>Department of Physics, Himachal Pradesh University, Shimla, India 171005*

(May 29, 2020)

\*Email: [j.poojaa1228@gmail.com](mailto:j.poojaa1228@gmail.com)

**Linear regression model analysis of total number of cases with total number of deaths and recovered cases , in different states in India (data taken up to 2<sup>th</sup> May 2020)**

**Jammu & Kashmir**

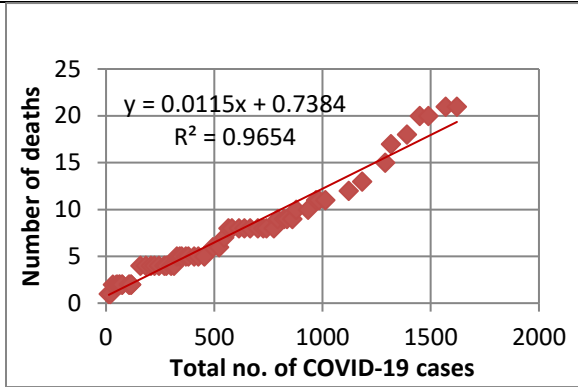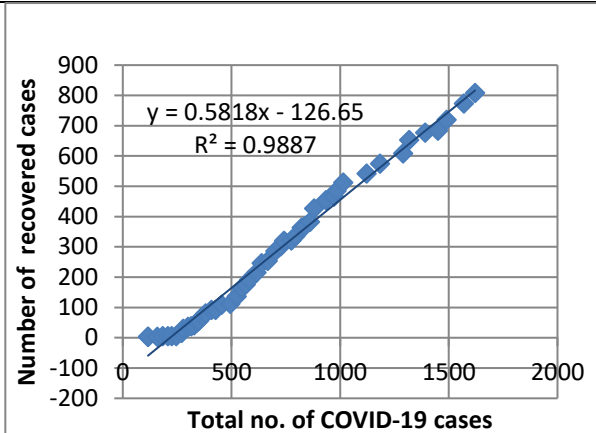

**Punjab**

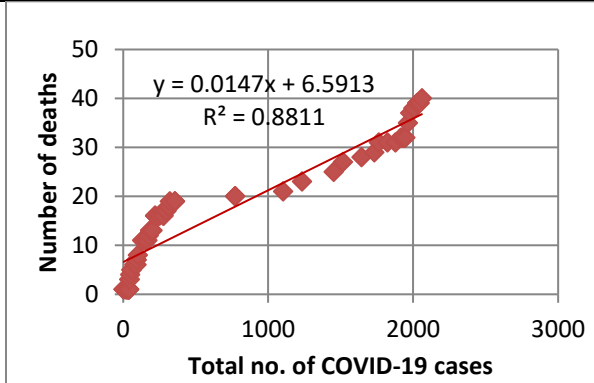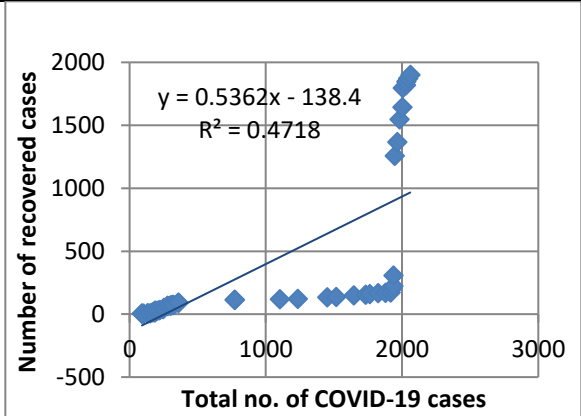

**Haryana**

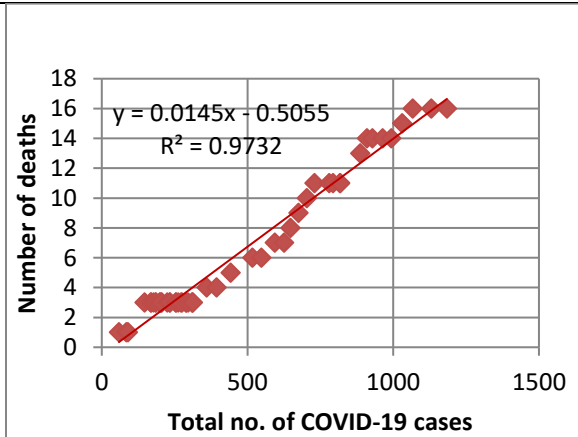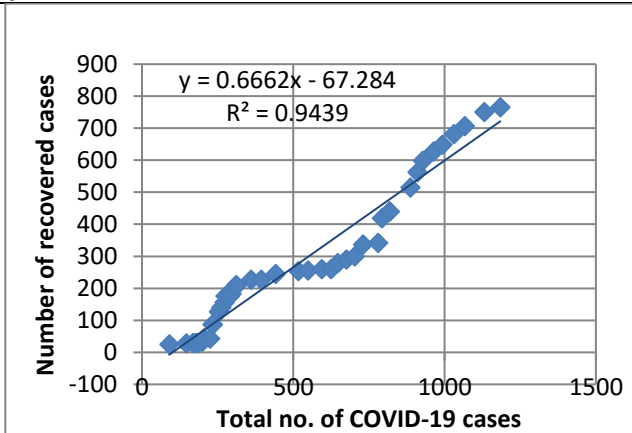

### Rajasthan

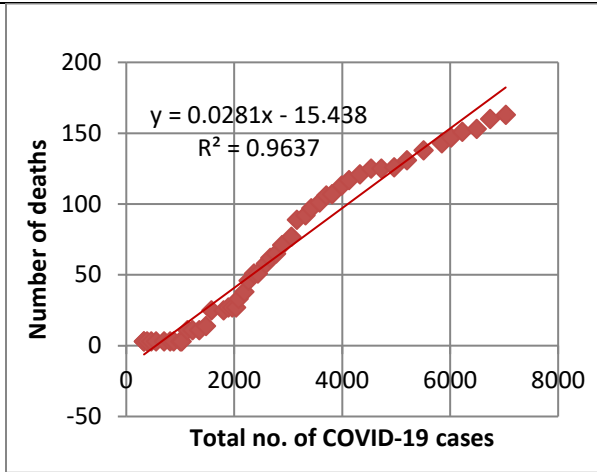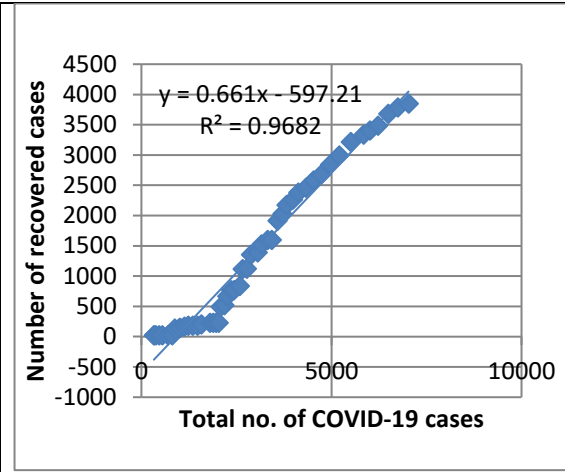

### Bihar

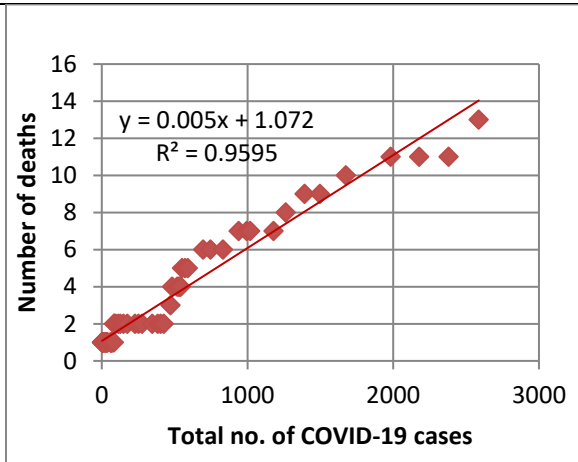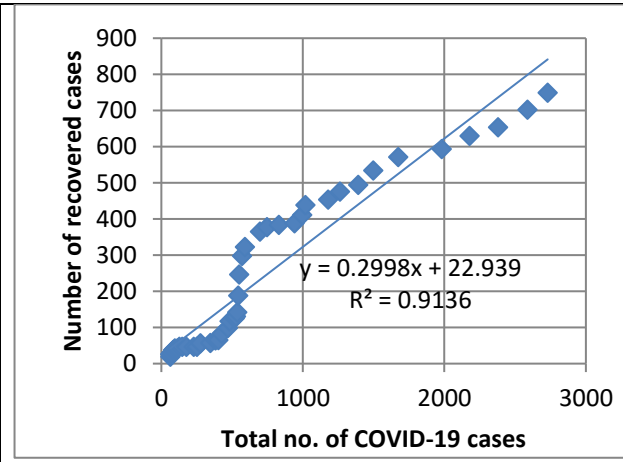

### Madhya Pradesh

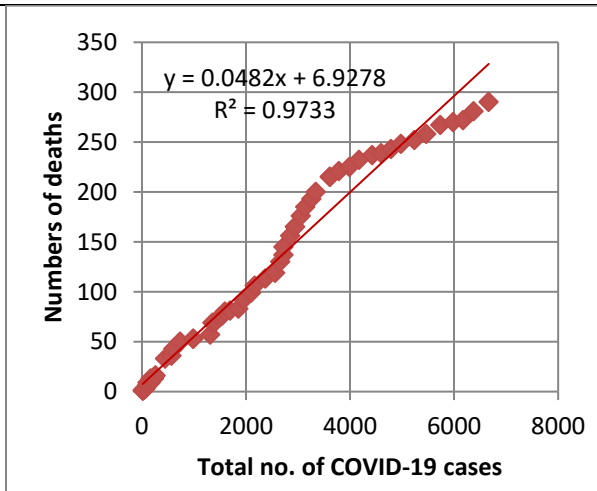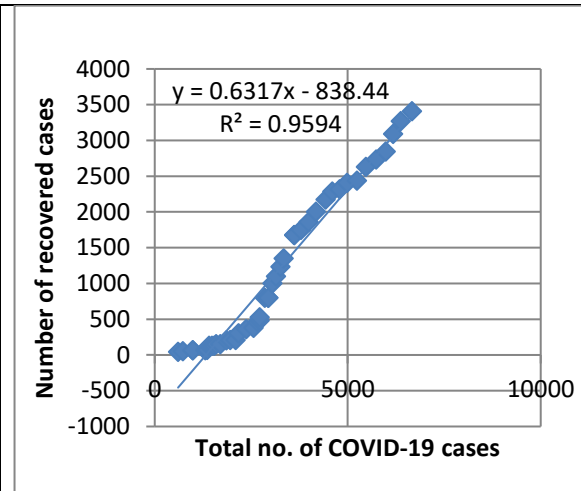

### Andhra Pradesh

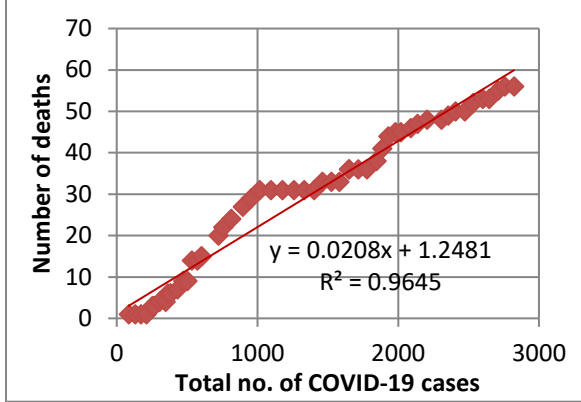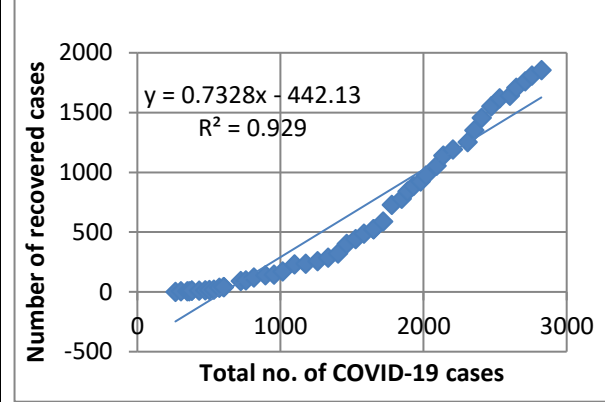

### Odisha

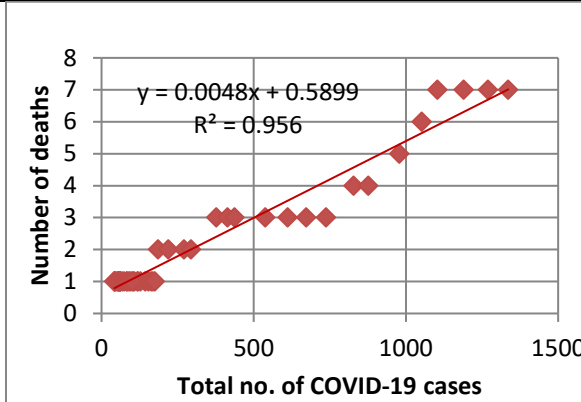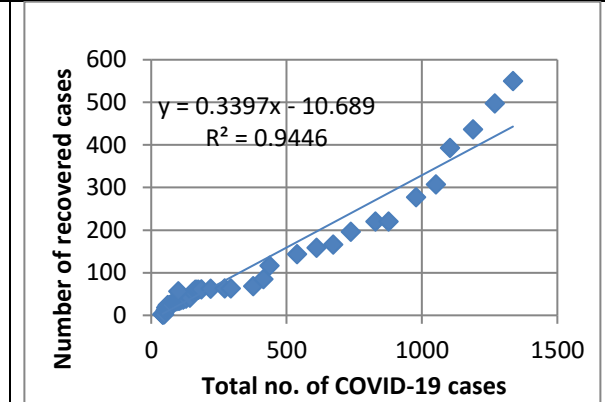

### Telangana

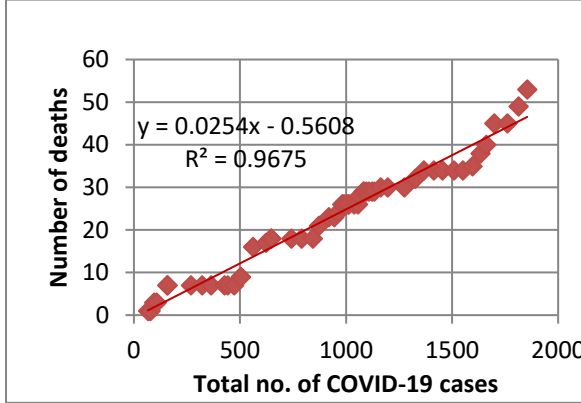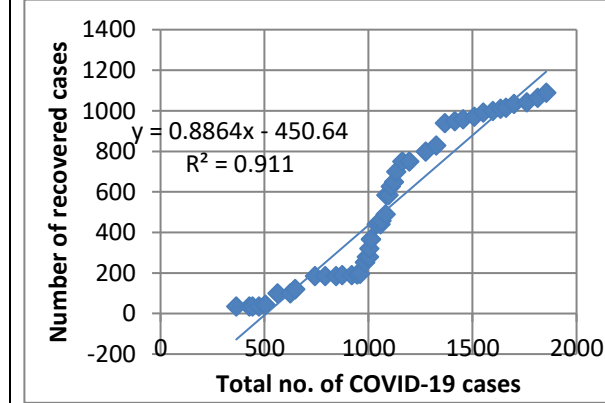

### West Bengal

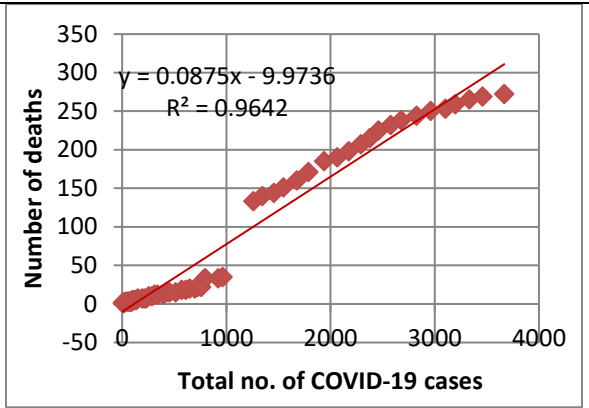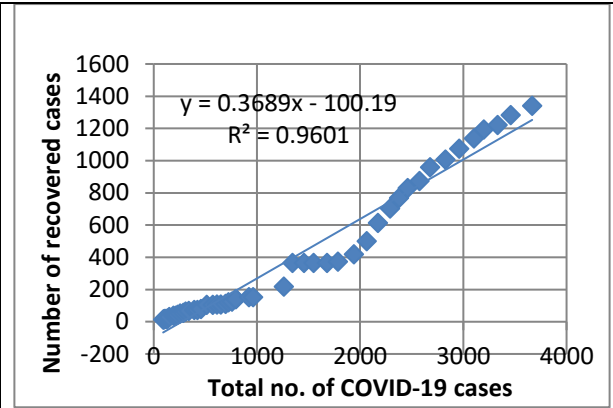

### Karnataka

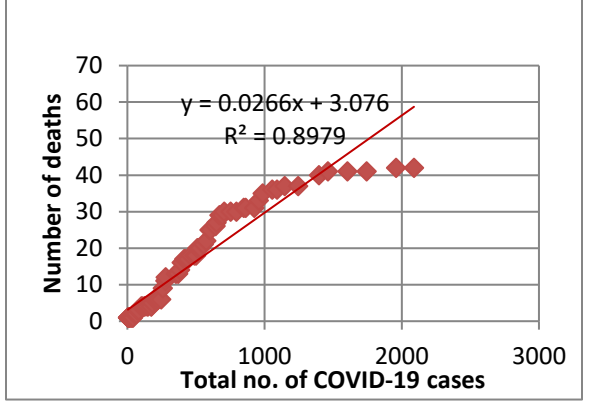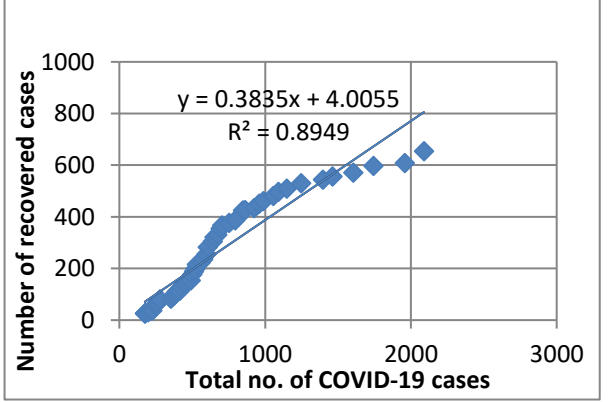

### Kerala

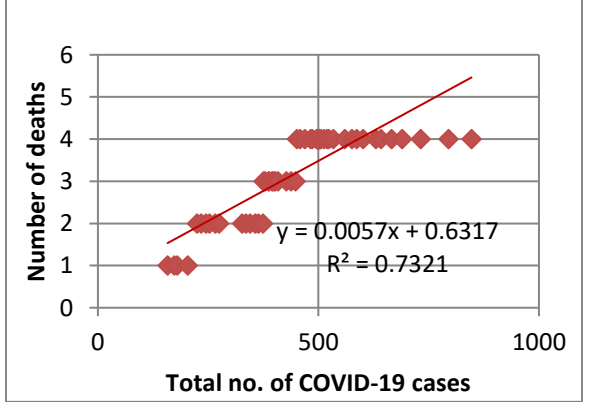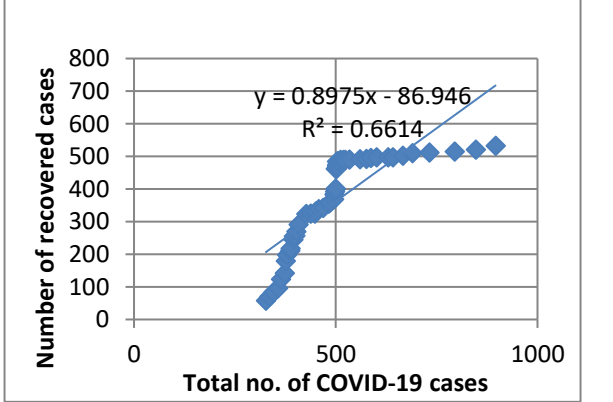

**Tamil Nadu**

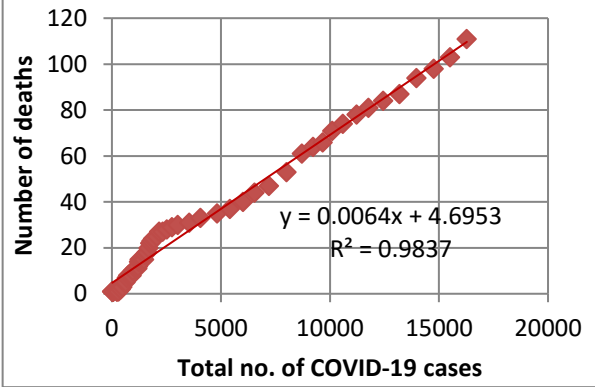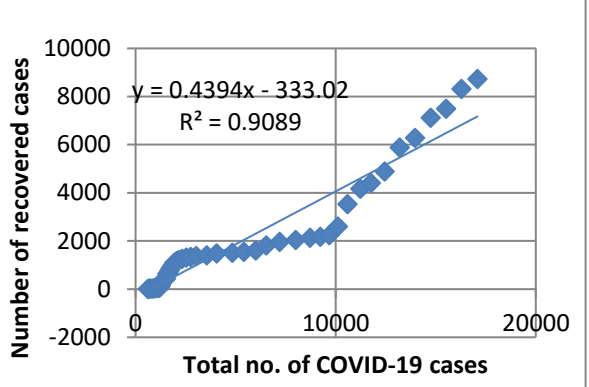

**Polynomial regression model analysis for various states: Total number of cases (y-axis) as a function of number of days since March 21, 2020 (x-axis).**

**JAMMU & KASHMIR**

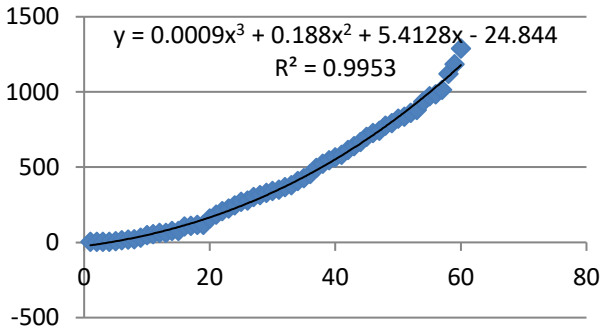

**UTTAR PRADESH**

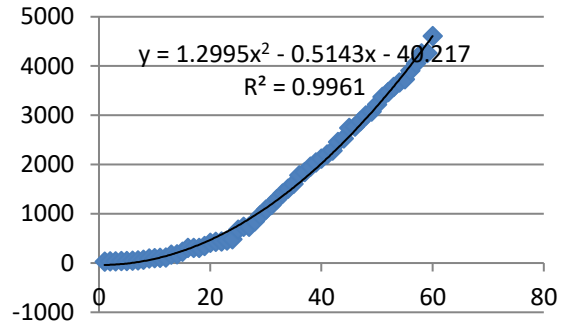

**RAJASTHAN**

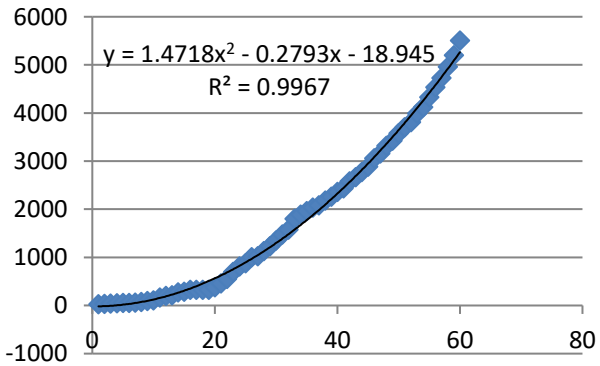

**PUNJAB**

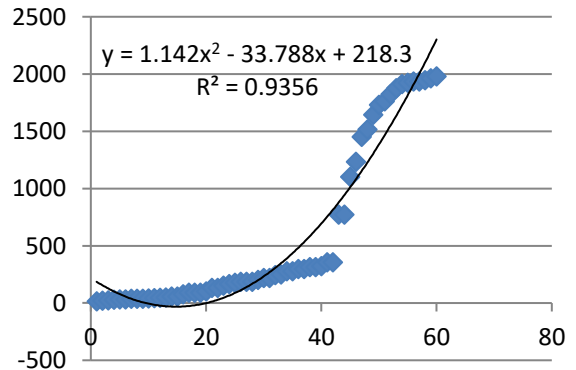

### HARYANA

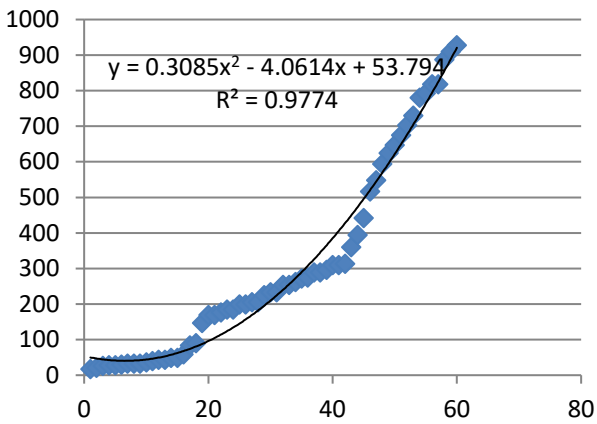

### BIHAR

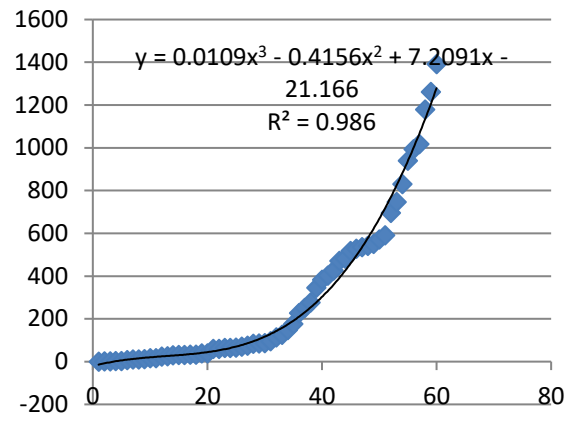

### MADHYA PRADESH

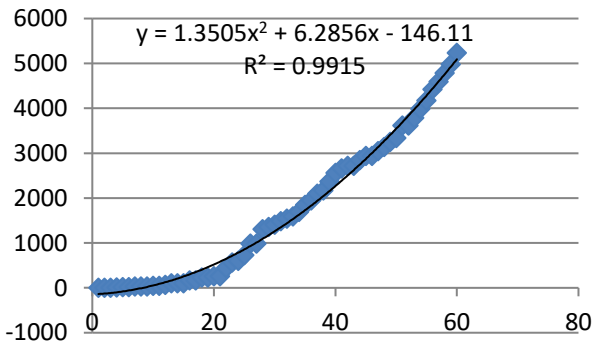

### ANDHRA PRADESH

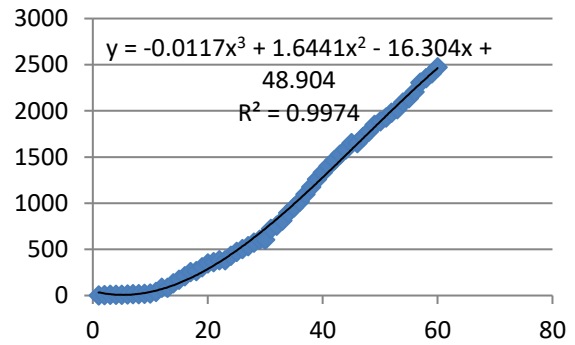

### ODHISA

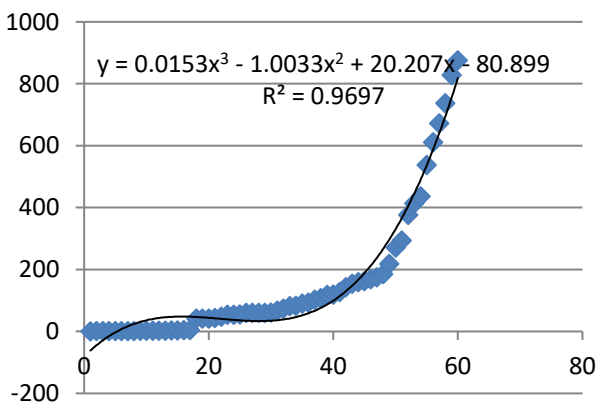

### TELANGANA

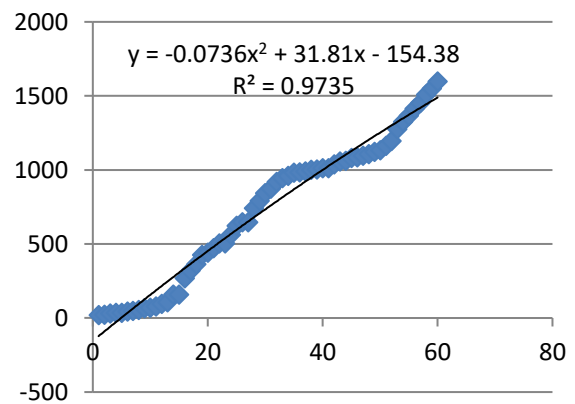

## KARNATAKA

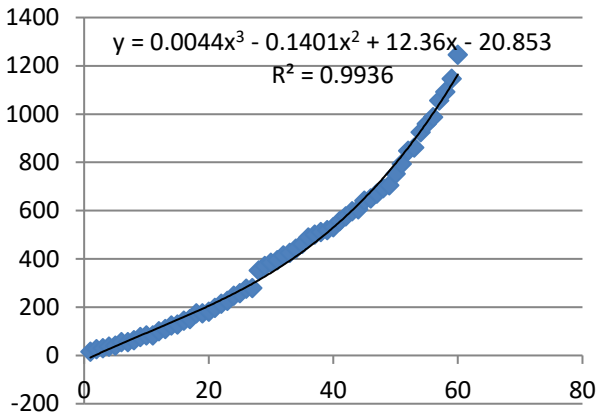

## KERALA

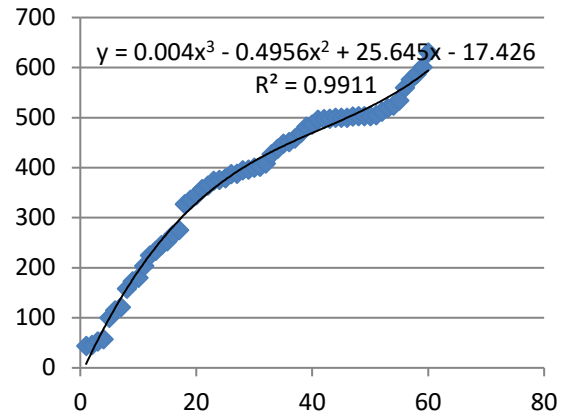

## TAMIL NADU

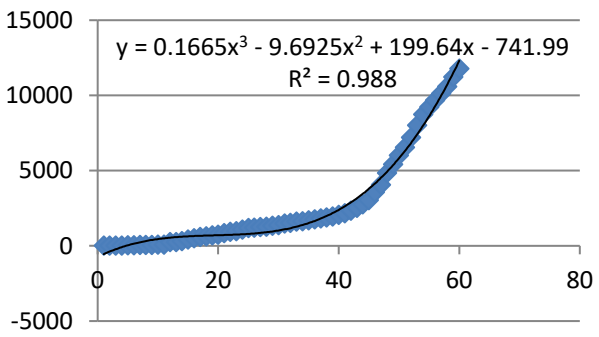

Supplement: Supplementary file [file 2020.05.29.20117069-1.pdf]
